# **A novel approach to concentrate human and animal viruses from wastewater using receptors-conjugated magnetic beads**

Chamteut Oh<sup>1</sup>, Kyukyong Kim<sup>2</sup>, Elbashir Araud<sup>3</sup>, Leyi Wang<sup>4</sup>, Joanna L. Shisler<sup>5</sup>, Thanh H. Nguyen<sup>1,6</sup>

Corresponding authors: Chamteut Oh ([co14@illinois.edu](mailto:co14@illinois.edu))

- 1) Department of Civil and Environmental Engineering, University of Illinois at Urbana-Champaign, USA
- 2) Department of Chemical and Biomolecular Engineering, University of Illinois at Urbana-Champaign, USA
- 3) Holonyak Micro & Nanotechnology Lab, University of Illinois at Urbana-Champaign
- 4) Veterinary Diagnostic Laboratory and Department of Veterinary Clinical Medicine, University of Illinois at Urbana-Champaign, United States
- 5) Department of Microbiology, University of Illinois at Urbana-Champaign, USA
- 6) Institute of Genomic Biology, University of Illinois at Urbana-Champaign, USA

23

### Graphical abstract

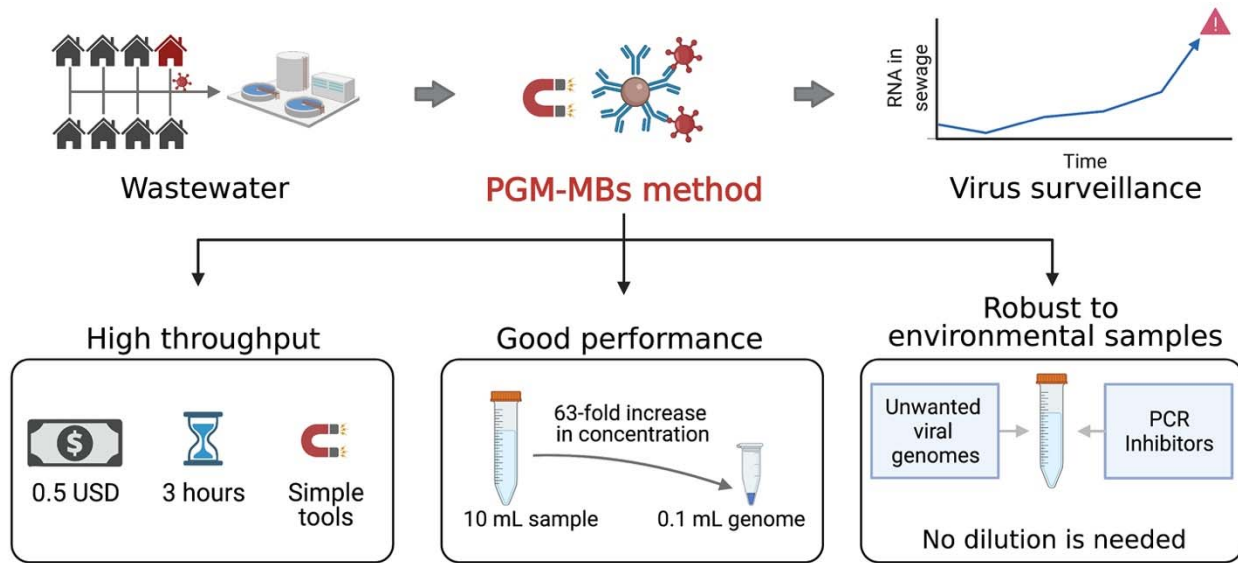

24

25

26

27 **Abstract**

28 Viruses are present at low concentrations in wastewater, and therefore an effective concentration  
29 of virus particles is necessary for accurate wastewater-based epidemiology (WBE). We designed  
30 a novel approach to concentrate human and animal viruses from wastewater using porcine gastric  
31 mucin-conjugated magnetic beads (PGM-MBs). We systematically evaluated the performances  
32 of the PGM-MBs method (sensitivity, specificity, and robustness to environmental inhibitors)  
33 with six viral species including Tulane virus (a surrogate for human norovirus), rotavirus,  
34 adenovirus, porcine coronavirus (transmissible gastroenteritis virus or TGEV), and two human  
35 coronaviruses (NL63 and SARS-CoV-2) in influent wastewater and raw sewage samples. We  
36 determined the multiplication factor (the ratio of genome concentration of the concentrated over  
37 that of the initial solution) for the PGM-MBs method, which ranged from 1.3 to 64.0 depending  
38 on the viral species. Because the recovery efficiency became significantly higher when  
39 calculated based on virus titers than genome concentration, the PGM-MBs method could be an  
40 appropriate tool for assessing the risk due to wastewater contaminated with infectious enteric  
41 viruses. PCR inhibitors were not concentrated by PGM-MBs, suggesting this tool will be  
42 successful for use with environmental samples. The PGM-MBs method is cost-effective (0.43  
43 USD/sample) and fast turnaround (3 hours from virus concentration to genome quantification),  
44 and thus this method can be implemented for high throughput facilities. Based on good  
45 performance, intrinsic characteristics of targeting the infectious virus, robustness to wastewater,  
46 and adaptability to high throughput systems, we are confident that the PGM-MBs method can be  
47 applied for successful WBE and ultimately provides valuable public health information.

48 **Keywords (maximum 6):** Porcine gastric mucin conjugated magnetic beads (PGM-MBs); virus  
49 concentration method; wastewater-based epidemiology; SARS-CoV-2; enteric viruses

## 50 1. Introduction

51 Enteric viruses are the leading cause of gastroenteritis worldwide. Many enteric viruses, such as  
52 rotavirus, norovirus, and adenoviruses, are shed in fecal material (Kang, 2017; Kapikian, 1996).  
53 Other airborne viruses, like SARS-CoV-2, are also shed in the human stool (Hu et al., 2020).  
54 Thus, wastewater-based epidemiology (WBE) can be a powerful tool to detect viral transmission  
55 in communities even before the appearance of clinical cases (Ahmed et al., 2021; Harris-Lovett  
56 et al., 2021; Hart and Halden, 2020; Nemudryi et al., 2020; Panchal et al., 2021; Sherchan et al.,  
57 2021). However, virus monitoring faces a challenge that the viral concentration in wastewater  
58 may be below the detection limit of analysis instruments such as qPCR system, especially when  
59 transmission has just started in communities. Although viruses such as noroviruses, adenoviruses,  
60 and enteroviruses are excreted at high concentrations (up to  $10^{11}$  viruses/g-feces), the viruses are  
61 diluted by different sources of water (Haramoto et al., 2018). For example, Albinana-Gemenez et  
62 al. (2006) detected  $10^6$ - $10^7$  gene copies (gc)/L of adenoviruses and polyomaviruses in sewage,  
63 but the virus concentrations decreased to  $10^1$  to  $10^2$  gc/L for river water. Since the lower limit of  
64 qPCR detection is about  $10^0$  gc/ $\mu$ L (or  $10^6$  gc/L), viruses from wastewater samples must be  
65 concentrated into smaller volumes. There are several strategies available to concentrate viruses  
66 from wastewater include ultracentrifugation, ultrafiltration, adsorption/extraction, skimmed-milk  
67 flocculation, polyethylene glycol (PEG) precipitation, and sludge extraction methods (Ahmed et  
68 al., 2020; Jafferli et al., 2021; Wolfe et al., 2021). However, those conventional virus  
69 concentration methods are expensive, time-consuming, and resource-demanding processes  
70 (Gibas et al., 2021; LaTurner et al., 2021; Polo et al., 2020), so this process often becomes a  
71 bottleneck in monitoring viruses in wastewater. Therefore, there is an urgent need for a new  
72 virus concentration method that is simple and fast.

73 In the recent past, we and others have coated magnetic beads (MB) with porcine gastric  
74 mucin (PGM) to study virus binding properties (Afolayan et al., 2016; Araud et al., 2018;  
75 Fuzawa et al., 2019; Oh et al., 2020; Walker et al., 2019). The PGM is a biological substrate that  
76 includes molecules (e.g., glycans) that act as virus receptors. Thus, we hypothesize that these  
77 PGM-MBs can selectively concentrate viruses from wastewater. An additional benefit of PGM-  
78 MBs is that they can capture infectious virus particles instead of viral genomes, giving a more  
79 accurate quantification of risk for WBE.

80 The objective of this research was to design and optimize this receptor-based virus  
81 concentration method using porcine gastric mucin conjugated-magnetic beads (PGM-MBs) and  
82 evaluate the efficacy of PGM-MBs compared to its conventional counterparts. **Fig. S1** shows  
83 five steps of the PGM-MBs method from wastewater sample pretreatment, virus attachment,  
84 virus concentration, genome extraction, to genome quantification step. We first optimized the  
85 method using influent wastewater spiked with five virus strains (Tulane virus (TV), rotavirus  
86 (RV), adenovirus (AdV), human coronavirus (NL63), and porcine coronavirus (transmissible  
87 gastroenteritis virus; TGEV). We selected these viruses based on their significance for public  
88 health and economy (Binder et al., 2017; Fielding, 2011; Katayama et al., 2002; La Rosa et al.,  
89 2020a; Lodder and De Roda Husman, 2005; Waruhiu et al., 2017). We systematically evaluated  
90 the performances of the PGM-MBs method (sensitivity, specificity, and robustness to  
91 environmental inhibitors) with 20 sewage samples spiked with these enteric viruses. In addition,  
92 we used PGM-MBs in local sewage samples to concentrate SARS-CoV-2 and compared its  
93 performances to electronegative filtration methods, one of the most widely used virus  
94 concentration methods. The findings suggest that PGM-MBs can be simple, affordable, but still  
95 accurate tools for WBE.

96

## 97 **2. Materials and Methods**

### 98 **2.1. PGM-MBs virus concentration method**

99 The porcine gastric mucin conjugated magnetic beads (PGM-MBs) were produced as described  
100 in our previous studies (Araud et al., 2018; Fuzawa et al., 2019; Oh et al., 2020), and the  
101 detailed procedure is elaborated in **Text S1**. The PGM-MBs is suspension that includes 1-4  $\mu\text{m}$   
102 diameter beads at a concentration of  $2 \times 10^6$  beads/ $\mu\text{L}$ . The pretreatment of wastewater samples,  
103 necessary to remove solid particles that can otherwise interference with subsequent analysis, was  
104 achieved by either gravitational settling for 2 hours or filtration through 0.22  $\mu\text{m}$  membrane  
105 filters (S2GPT02RE, Millipore Sigma, USA). The virus attachment to the PGM-MBs was  
106 optimized by changing the  $\text{MgCl}_2$  concentration between 0 to 100 mM. Specifically, the PGM-  
107 MBs and  $\text{MgCl}_2$  were added to a wastewater sample at a 1:1000 volume ratio and 50 mM,  
108 respectively. For example, we put 10  $\mu\text{L}$  of the PGM-MBs into 10 mL of the samples for the  
109 optimization experiments and 50  $\mu\text{L}$  PGM-MBs to 50 mL sewage for SARS-CoV-2 surveillance.  
110 The mixture was shaken for 30 minutes on an orbit shaker at 450 rpm (Fisher Scientific, USA) at  
111 room temperature. Then, the virus-containing PGM-MBs were concentrated by a magnet  
112 (DH125J-FN, Amazing magnets, USA) placed at the outside surface of the bottom of the tube  
113 for about 30 minutes and the clear supernatant was removed. The remaining PGM-MBs and  
114 supernatant were collected and transferred to a 1.5 mL low adhesion microcentrifuge tube (1415-  
115 2600, USA scientific, USA). The PGM-MBs were washed three times by sequentially  
116 resuspending beads in 1 mL PBS, collecting beads by using a magnetic separation rack (S1509S,  
117 New Biolabs Lab, USA), and removing supernatants. Finally, the viral genomes were extracted  
118 by heat denaturation method and quantified by either qPCR or RT-qPCR depending on viral

119 species, which is elaborated in Section 2.1. Also, Section 3.1 presents the results of the PGM-  
120 MBs optimization experiments.

121

## 122 **2.2. Viral nucleic acid extraction and quantification**

123 Commercial nucleic acid extraction kits are expensive, time-consuming and could be in short  
124 supply (Satyanarayana, 2020). Therefore, we established a heat denaturation method compatible  
125 with the PGM-MBs method to reduce resources (cost, time, and labor). The heat denaturation  
126 method started with resuspending a pellet of virus-containing PGM-MBs with 100  $\mu$ L proteinase  
127 K (P8107S, New England Biolabs, USA) that was diluted 100-fold by molecular biology grade  
128 water (Millipore Sigma) for denaturation of the viral capsid. The mixture was then transferred to  
129 a 200  $\mu$ L-size PCR tube (14-222-262, Fisher Scientific, USA) and incubated at 95 $^{\circ}$ C for 10  
130 minutes using a thermal cycler (MyCycler<sup>TM</sup>, Bio-Rad), followed by quick cooling on ice. While  
131 being heated, the viral genomes were released from the capsid, and the proteinase K was  
132 inactivated. The PGM-MBs were pelletized by a magnet (S1509S, New Biolabs Lab, USA) for  
133 one minute, and the genomes were taken from the supernatant near the solution surface for  
134 further analysis. The concentrations of viral genomes were quantified by SYBR-based RT-qPCR  
135 for TV, RV, NL63, and TGEV; Taqman-based RT-qPCR for SARS-CoV-2; or SYBR-based  
136 qPCR for AdV. We used iTaq universal SYBR green reaction mix (Bio-Rad Laboratories, USA)  
137 for TV, RV, NL63, and TGEV analysis, PowerUp SYBR<sup>TM</sup> Green Master Mix (Applied  
138 Biosystems, CA, USA) for AdV quantification, and Taqman Fast Virus 1-step Master Mix  
139 (4444432, Applied Biosystems, USA) for SARS-CoV-2. Viral genomes were quantified using a  
140 qPCR system (QuantStudio 3, Thermo Fisher Scientific, USA). **Table S1** summarized these RT-  
141 qPCR methods following the MIQE guidelines (Bustin et al., 2009). **Text S2** provides detailed

142 information about qPCR analysis, including thermal cycles, qPCR cocktail compositions, and  
143 primers.

144

### 145 **2.3. Preparing viruses for experiments with virus-spiked wastewater**

146 We determined the performance of the PGM-MBs method using influent wastewater spiked with  
147 viruses propagated *in vitro*. These viruses are Tulane virus (TV, *Caliciviridae*, a viral surrogate  
148 for human norovirus) (Yu et al., 2013), rotavirus OSU strain (RV, *Reoviridae*, ATCC VR-892),  
149 adenovirus type 2 (AdV, *Adenoviridae*, ATCC VR-846), human coronavirus (NL63,  
150 *Coronaviridae*), and porcine coronavirus (TGEV, *Coronaviridae*). We obtained TV from the  
151 Cincinnati Children's Hospital Medical Center. We obtained NL63 strain from BEI sources (NR-  
152 470). TGEV is a porcine enteric virus, and is in the same family as NL63 and SARS-CoV-2  
153 (*Coronaviridae*). We received the TGEV from the Veterinary Diagnostic Laboratory at the  
154 University of Illinois at Urbana-Champaign. Rotavirus strain OSU strain (RV, *Reoviridae*,  
155 ATCC VR-892) and adenovirus type 2 (AdV, *Adenoviridae*, ATCC VR-846) were obtained from  
156 the ATCC. Detailed information about propagation methods including culture media and  
157 growing conditions is elaborated in **Text S3**. Plaque assays were used to determine titers of TV,  
158 RV, AdV, and TGEV. TCID50 assays were used to quantify NL63 titers. MA104 (ATCC, CRL-  
159 2378.1) was used as a host cell line for TV and RV plaque assay. A549 (ATCC; CCL-185), MK2  
160 cells (ATCC, CCL-7), and ST cells (CRL-1746, ATCC) were used to determine virus titers of  
161 AdV, NL63, and TGEV, respectively. Detailed information on virus titer determination is  
162 summarized in **Text S4**.

163



164           **2.4. Collection of influent wastewater and local sewage samples for method**  
165                           **optimization and evaluation**

166 We collected environmental samples from 10 locations from January to July 2021 (20 samples in  
167 total) to cover a variety of wastewater. We collected a 24-hour composite of influent wastewater  
168 on February 3rd, 2021, from the Urbana & Champaign Sanitary District, IL, USA, a district that  
169 serves about 100,000 local residents. Because the bacteria present in the wastewater interfere  
170 with the plaque assays, a portion of the influent wastewater was filtered through a 0.22  $\mu\text{m}$   
171 polyethersulfone membrane filter (S2GPT02RE, Millipore Sigma, USA), and the filtered  
172 influent wastewater was used for sensitivity and specificity experiments (Section 3.1, 3.2, 3.3,  
173 and 3.6). The filtrate was stored at  $-80^{\circ}\text{C}$  until used. The filtrate was thawed and stored at  $4^{\circ}\text{C}$  for  
174 less than two weeks, a time period where we conducted all experiments in this study.

175           Three-day composite sewage samples were collected from January to July 2020 from 10  
176 different neighborhood-level sewersheds across Champaign County, IL, USA (**Table S3**). These  
177 sewage samples were stored at  $4^{\circ}\text{C}$  for less than two weeks before being used to test the impact of  
178 the filtration process on performances of the PGM-MBs method (Section 3.4) and the tolerance  
179 of the PGM-MBs method to PCR inhibitors (Section 3.5). In addition, the SARS-CoV-2  
180 concentration in these sewages were measured for a smaller aliquot of these samples kept at  $-80^{\circ}\text{C}$   
181 for less than a week and analyzed as soon as they were defrosted (Section 3.7). Information  
182 including sampling locations and dates was summarized in **Table S3**.

183

184           **2.5. Recovery efficiencies of the PGM-MBs method**

185 In an experiment conducted to evaluate performances of the PGM-MBs method with different  
186 viral genome concentrations, we spiked 100  $\mu\text{L}$  of either TV, RV, AdV, NL63 or TGEV into 10

187 mL of filtered influent wastewater (**Table S3**). The initial genome copies spiked to wastewater  
188 were about  $10^7$  gc for TV and NL63 and about  $10^8$  gc for RV, AdV, and TGEV. The wastewater  
189 was serially diluted in 10-fold increments (four serial dilutions for TV and NL63 and five serial  
190 dilutions for RV, AdV, and TGEV) and the three biological replicates were prepared. The results  
191 from this experiment can be found in Section 3.2.

192 We conducted another experiment to compare the recovery efficiencies (RE) of the  
193 PGM-MBs method by examining viral genome concentration or virus titer. For these  
194 experiments, 10  $\mu$ L of virus (about  $10^4$  PFU of TV, RV, AdV, and TGEV, and  $10^3$  TCID<sub>50</sub> of  
195 NL63) and 10  $\mu$ L of MgCl<sub>2</sub> (final concentrations of 50 mM) was added to 1 mL of six different  
196 filtered sewage samples (**Table S3**). Viral genome concentrations and infectious virus titers in  
197 the initial sewage samples were quantified. After that, we put 10  $\mu$ L of PGM-MBs to these  
198 sewage samples. Then, we took the supernatant and quantified its genome concentrations and  
199 virus titers. We assumed that the difference in viral genomes and virus titers between the initial  
200 sewage and the supernatant is the recovered genomes and virus titers by the PGM-MBs method  
201 (Eq. 1). Section 3.3 presents the results from this experiment.

202

$$203 \quad RE = \frac{\text{Virus genomes or titers}_{\text{Initial sewage}} - \text{Virus genomes or titers}_{\text{Supernatant}}}{\text{Virus genomes or titers}_{\text{Initial sewage}}} \quad (\text{Eq. 1})$$

204

## 205 **2.6. Tolerance for PCR inhibitors**

206 We conducted a set of experiments to understand the impact of solid particles on  
207 performances (RE and tolerance to PCR inhibitors) of the PGM-MBs method. We chose 6  
208 sewage samples collected from different sampling locations or times. These sewage samples  
209 were left in a refrigerator at 4°C for two hours without disturbance to mimic sedimentation. The

210 liquid near the surface of these samples was used for two experiments. In the first experiment,  
211 this liquid was used as it is. In the second experiment, this liquid was filtered by 0.22  $\mu\text{m}$  pore  
212 size filters. Each of five viral species (about  $10^6$  gc) was added to 10 mL of either the filtered or  
213 the unfiltered samples before these samples were subjected to the PGM-MBs. The concentrations  
214 of viral genomes in samples before and after the PGM-MBs method were quantified and the  
215 recovery efficiencies were calculated. In addition, we tested the impact of solid particles as PCR  
216 inhibitors. In these experiments, we used the same pairs of unfiltered and filtered samples  
217 described above. Then, we applied the PGM-MBs method to the sewage samples, to which we  
218 did not spike any viruses. After we obtained the final extracts from the PGM-MBs sample, we  
219 spiked 1  $\mu\text{L}$  of TV genomes to 10  $\mu\text{L}$  of the final extracts. Because TV is a Rhesus monkey virus,  
220 they are not expected in the sewage samples. The same number of TV genomes was added to  
221 PCR inhibitor-free water (molecular biology grade water) as control samples. The results about  
222 the impact of solid particles on the performances of the PGM-MBs method are presented in  
223 Section 3.4.

224 We also tested tolerance of the PGM-MBs method to PCR inhibitors in environmental  
225 samples. We collected 19 different sewage samples and 1 sample from lagoon (**Table S3**). We  
226 also dissolved humic acid (41747, Alfa Aesar, USA), which was extracted by alkaline extraction  
227 method from brown coal, to molecular biology grade water at a final concentration of 20 mg C/L.  
228 These 21 samples were filtered through 0.22  $\mu\text{m}$  membrane filters before being processed these  
229 21 samples with two different methods: a commercially available genome extraction kit (Viral  
230 RNA Mini Kit) and the PGM-MBs method. We subjected 140  $\mu\text{L}$  of the samples to the Viral  
231 RNA Mini Kit (QIAGEN, German) and obtained 60  $\mu\text{L}$  of the final solution. To test the PGM-  
232 MBs method, we put 10  $\mu\text{L}$  of the PGM-MBs to 10 mL of the samples adjusted to 50 mM of

233 MgCl<sub>2</sub> and 100 µL of a final solution was obtained. Then, we spiked 1 µL of TV genomes to 10  
234 µL of the two types of final solutions (i.e., genome extraction kit and PGM-MBs method) and  
235 molecular biology grade water as PCR inhibitor negative controls. The results on the tolerance of  
236 the PGM-MBs to PCR inhibitors are presented in Section 3.5.

237

## 238 **2.7. Specificity of the PGM-MBs method**

239 We prepared three different solutions: molecular biology grade water, filtered influent  
240 wastewater without spiking viruses, and filtered influent wastewater with the four different viral  
241 species spiked. For example, for a TV specificity test, the other four virus species (RT, AdV,  
242 NL63, and TGEV) were spiked into 10 mL of the filtered influent wastewater to test impact of  
243 co-existing viral species on detection of TV genomes. Then, we applied the PGM-MBs method  
244 to each of these three solutions and analyzed target virus concentrations in the final extracts from  
245 the control wastewater and the four virus-spiked wastewater. All samples were categorized into  
246 either positives (i.e., Ct values less than 40) or negatives (undetermined or Ct values higher than  
247 40). The results of the specificity experiment can be found in Section 3.6.

248 We applied the PGM-MBs method and electronegative membrane filtration method to 50  
249 mL of 7 different sewage samples. The sewage samples were filtrated by 0.22 µm membrane  
250 filters and the filtrate was supplemented by the MgCl<sub>2</sub> at a final concentration of 50 mM. We  
251 added about 10<sup>5</sup> gc of NL63 as a internal control. These samples were incubated at room  
252 temperature for 30 minutes before processing them either by the PGM-MBs method or the  
253 electronegative membrane filtration method. For the PGM-MBs method, we put 50 µL of the  
254 PGM-MBs to the 50 mL of samples. The electronegative membrane filtration started with  
255 filtering the 50 mL of sewage samples through 0.45 µm electronegative membranes. After that,

256 the membrane filter was placed into a 5 mL tube (0030119487, Eppendorf, Germany). We put a  
257 mixture of lysing buffer (2800  $\mu$ L) and RNA carrier (28  $\mu$ L) followed by 1-minute vortex, 15-  
258 minute shaking at 450 rpm, and subsequent 1-minute vortex. Section 3.7 presents the results of  
259 the comparison between the PGM-MBs method and the electronegative membrane filtration  
260 method.

261

## 262 **2.8. Statistical analysis**

263 Mann-Witney test was conducted to compare differences in recovered viral genomes depending  
264 on different  $MgCl_2$  concentrations (**Fig. 1A**) and extraction method (i.e., heat denaturation  
265 method and extraction kit; **Fig. 1B**). Paired sample t-test was performed to compare recovery  
266 efficiencies determined either by genome concentration or virus titer (**Fig. 5**) and to compare  
267 recovery efficiencies with filtered and unfiltered sewage samples (**Fig. 6**). There were no outliers  
268 (i.e., all data for the paired t-test exist within a range from  $Q1-1.5IQR$  and  $Q3+1.5IQR$ ). Also,  
269 normalities of the differences between two data sets were checked by Shapiro-Wilk test. Two-  
270 sample proportion test was conducted to compare two binomial proportions of Ct values less  
271 than 40 from control wastewater and virus-spiked wastewater in **Table 2**. We added notes to  
272 **Table 2** showing if sample size (n) times proportion (p) is greater than 5, which is an assumption  
273 for the two-sample proportion test. All statistical analysis was conducted by OriginPro 2019b.

274

## 275 3. Results

### 276 3.1. Optimization of the PGM-MBs method for efficient concentration of enteric 277 viruses in wastewater

278 We tested  $MgCl_2$  concentration and genome extraction method to optimize the PGM-MBs  
279 method.  $MgCl_2$  is known to reduce repulsive electrical double layer force of small particles such  
280 as viruses in liquid (Gorrepati et al., 2010; Gutierrez and Nguyen, 2012), so it has been used to  
281 improve the performance of adsorption-based virus concentration methods such as  
282 electronegative membrane filtration method (Ahmed et al., 2020; LaTurner et al., 2021; Lu et al.,  
283 2020). We varied  $MgCl_2$  concentrations of the influent wastewater from 0 mM to 100 mM to  
284 find the optimum concentration for virus-PGM-MB interactions. **Fig. 1A** shows the amount of  
285 viruses recovered by PGM-MBs when different  $MgCl_2$  concentrations were used. With the  
286 exception of TGEV,  $MgCl_2$  increased the amount of virus binding to PGM-MBs. For example,  
287 the binding efficiency to PGM-MBs significantly increased for TV or NL63 as  $MgCl_2$   
288 concentration increased until 10 mM (Mann-Whitney test,  $p < 0.05$ ). The binding efficiencies of  
289 RV or AdV to PGM-MBs became insignificantly different at 50 and 100 mM  $MgCl_2$  (Mann-  
290 Whitney test,  $p < 0.05$ ). Therefore, 50 mM was determined as the optimal concentration of  $MgCl_2$   
291 for the PGM-MBs method.

292 Second, we established a heat denaturation method to release genomes from viruses  
293 bound to PGM-MBs as an alternative to using nucleic acid extraction kits. This method only  
294 requires the addition of proteinase K followed by heating up at  $95^\circ C$  for 10 minutes. **Fig. 1B**  
295 presents the results obtained from two experiments, in which the PGM-MBs method was applied  
296 to the spiked wastewater samples and the retrieved PGM-MBs were subjected to either an  
297 extraction kit (Viral RNA Mini Kit, Qiagen) or the heat denaturation method. The RNA

298 extraction kit resulted in a significantly lower genome copy number than the heat denaturation  
 299 method (Mann-Whitney Test  $p < 0.05$ ). Based on this comparison, the alternative nucleic  
 300 extraction method using Proteinase K and heat treatment can be recommended for PGM-MBs  
 301 method.

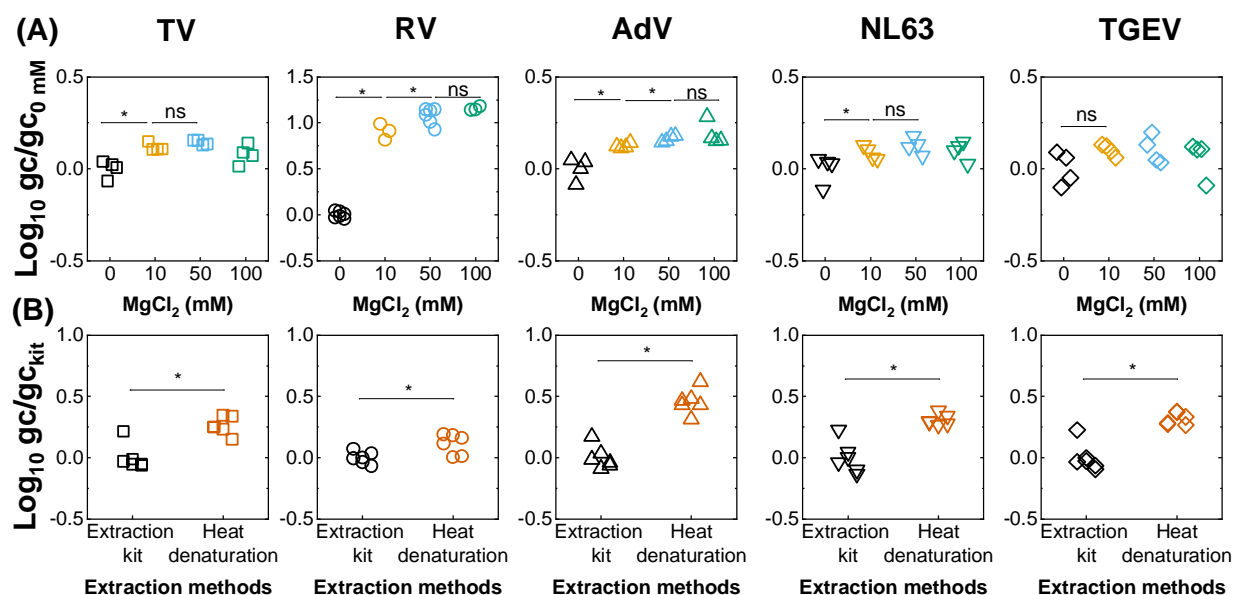

302  
 303 **Fig. 1. (A)** Determination of the optimum  $\text{MgCl}_2$  concentration. The y-axis indicates the  
 304 recovered viral genomes at different  $\text{MgCl}_2$  concentrations divided by the average number of  
 305 viral genomes at 0 mM of  $\text{MgCl}_2$ . **(B)** Comparison between results obtained with Viral RNA  
 306 Mini Kit and with the heat denaturation method. The y-axis represents the recovered viral  
 307 genomes divided by average number of viral genomes by extraction kit. Statistical analysis of  
 308 two groups of results were conducted by a non-parametric test (Mann-Whitney Test; \*:  $p < 0.05$   
 309 and ns: no significant difference).

310

### 311 3.2. Evaluation of the PGM-MBs method with spiked viruses

312 Genome concentrations of the spiked viruses in the initial wastewater samples are plotted on the  
 313 X axis of **Fig. 2**. On the Y axis, we plotted the genome concentrations of the corresponding final  
 314 solutions after applying the PGM-MBs method. Linear correlations were obtained for all cases  
 315 ( $R^2 > 0.97$ ) as shown in **Fig. 2**. Based on these linear correlations, we determined recovery

316 efficiency (RE), concentration factor (CF), multiplication factor (MF), and LOQ<sub>PGM-MBs</sub> as  
 317 shown in Eqs 2-4.

318

319 
$$RE = \frac{\text{The number of virus particles}_{\text{Final solution}}}{\text{The number of virus particles}_{\text{Initial solution}}} \quad (\text{Eq. 2})$$

320 
$$CF = \frac{\text{Volume}_{\text{Final solution}}}{\text{Volume}_{\text{Initial solution}}} \quad (\text{Eq. 3})$$

321 
$$MF = \frac{\text{Concentration}_{\text{final solution}}}{\text{Concentration}_{\text{initial solution}}} = \frac{RE}{CF} \quad (\text{Eq. 4})$$

322

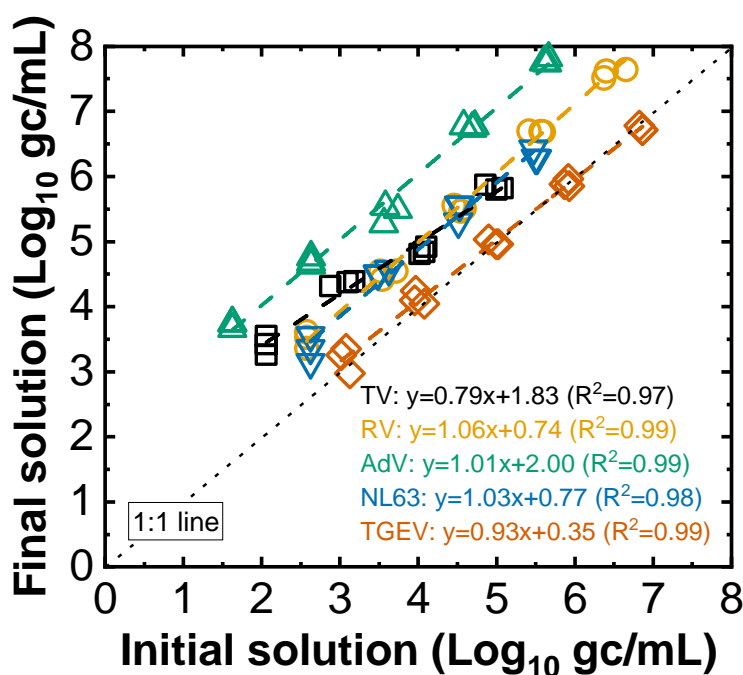

323  
 324 **Fig. 2** Calibration curves showing the relationship between genome concentrations of initial  
 325 solutions and final solutions. Three biological replications were tested for each concentration.  
 326

327 We summarized the average and standard deviation values for RE, CF, and MF obtained  
 328 for each viral species in **Table 1**. We found that the PGM-MBs method showed different  
 329 performances depending on testing viral species. For example, the REs ranged from 0.013  
 330 (TGEV) to 0.640 (AdV). The wide range of REs with different testing viruses were also reported



331 by previous studies (Uchida et al., 2007; Ye et al., 2016). Since CF values were maintained  
332 throughout the experiments to be 0.01 (i.e., 0.1 mL of final volume and 10 mL of initial volume),  
333 MF values also showed a wide range from 1.3 (TGEV) to 64 (AdV). The MF values showed that  
334 AdV could be concentrated 64 times, while TGEV was concentrated by 1.3 times. Regardless of  
335 the viral species, the PGM-MBs method was able to concentrate enteric viruses from 10 mL of  
336 wastewater.

337 LOQ is defined by the lowest genome concentrations that fulfill the following two  
338 conditions: 1) None of the replicates (e.g., nine qPCR samples from three biological replicates  
339 and three technical replicates) is undetermined by qPCR or RT-qPCR analysis, and 2) coefficient  
340 of variation for all replicates is less than 25% (Forootan et al., 2017; Kralik and Ricchi, 2017). In  
341 this study,  $LOQ_F$  is LOQ of final solution obtained by the PGM-MBs method. On the other hand,  
342 the  $LOQ_{PGM-MB}$  is the genome concentrations of initial solution whose final concentrations after  
343 being concentrated by the PGM-MBs method becomes the  $LOQ_F$ . By definition,  $LOQ_{PGM-MBs}$  is  
344 the lowest genome concentration of initial solution from **Fig. 2. Table 1** shows the LOQ of the  
345 PGM-MBs method for each viral species ranging from  $10^{4.63}$  to  $10^{6.08}$  gc/L. These LOQ values  
346 were comparable to the previously reported LOQs determined by 36 different methods for  
347 SARS-CoV-2 surveillance (Pecson et al., 2021).

348  
349 **Table 1.** The summary of the virus concentration experiment using the PGM-MBs method with  
350 10 mL of filtered influent wastewaters

| <b>Viral species</b> | <b>RE</b>   | <b>CF</b> | <b>MF</b> | <b>LOQ of PGM-PMs method (Log<sub>10</sub> gc/L)</b> |
|----------------------|-------------|-----------|-----------|------------------------------------------------------|
| <b>TV</b>            | 0.152±0.092 | 0.01      | 15.2±9.2  | 5.10                                                 |
| <b>RV</b>            | 0.123±0.041 | 0.01      | 12.3±4.1  | 5.57                                                 |
| <b>AdV</b>           | 0.640±0.166 | 0.01      | 64.0±16.6 | 4.63                                                 |

|             |             |      |          |      |
|-------------|-------------|------|----------|------|
| <b>NL63</b> | 0.103±0.023 | 0.01 | 10.3±2.3 | 5.62 |
| <b>TGEV</b> | 0.013±0.005 | 0.01 | 1.3±0.5  | 6.08 |

351  
 352 We compared the MF values obtained by PGM-MBs method and conventional virus  
 353 concentration methods applied in previous studies (Ahmed et al., 2020; LaTurner et al., 2021;  
 354 Philo et al., 2021; Randazzo et al., 2020; Ye et al., 2016). Since the previous publications used  
 355 different initial volumes, we calculated the MF values of PGM-MBs, which would be obtained  
 356 with wastewater samples used previously. For this calculation, we derived the following Eqs 5-7.  
 357 Since  $LOQ_{PGM-MBs}$  is one of the initial concentrations at a specific condition where its final  
 358 concentration is the  $LOQ_F$ , we can derive Eq. 5 from Eqs. 2-4.

359  
 360 
$$LOQ_{PGM-MBs} = \frac{1}{MF} \times LOQ_F = \frac{CF}{RE} \times LOQ_F = \frac{Volume_{Final\ solution}}{Volume_{Initial\ solution}} \times \frac{1}{RE} \times LOQ_F \quad (\text{Eq. 5})$$

361  
 362 Eq. 5 shows that  $LOQ_{PGM-MBs}$  are inversely proportional to  $Volume_{Initial\ solution}$ , so the  $LOQ_{PGM-MBs}$   
 363 will be lowered as the volume of the initial solution increases if the other variables such as  
 364  $Volume_{Final\ solution}$ ,  $LOQ_F$ , and  $RE$  remain constant as  $Volume_{Initial\ solution}$  changes. Therefore, we  
 365 can reasonably assume that  $Volume_{Final\ solution}$  and  $LOQ_F$  will be maintained if the same virus  
 366 concentration method and quantification instruments are used. We also assumed  $RE$  is  
 367 maintained when the volume ratio of the PGM-MBs to the initial solution is fixed to 10  $\mu$ L to 10  
 368 mL. Therefore, we can derive Eqs. 6-7.

369  
 370 
$$LOQ_{PGM-MBs} \times Volume_{Initial\ solution} = constant \quad (\text{Eq. 6})$$

371 
$$\frac{MF}{Volume_{Initial\ solution}} = constant \quad (\text{Eq. 7})$$

372

373 Eqs. 6-7 show  $LOQ_{PGM-MBs}$  and MF are functions of  $Volume_{Initial\ solution}$ , and thus we can calculate  
374  $LOQ_{PGM-MBs}$  and MF at different initial volumes such as 50, 200, and 1000 mL with  $LOQ_{PGM-MBs}$   
375 and MF values that were experimentally determined with the 10 mL of the initial solution (**Table**  
376 **S4**).

377 We calculated the MF values of the PGM-MBs method with different initial volumes by  
378 Eq. 7. These MF values are presented as the solid lines in **Fig. 3**. Open symbols represent the MF  
379 of conventional virus concentration methods reported by previous studies (Ahmed et al., 2020;  
380 LaTurner et al., 2021; Philo et al., 2021; Randazzo et al., 2020; Ye et al., 2016). These  
381 previously reported MF values vary depending on virus concentration methods (direct extraction,  
382 electronegative membrane, PEG, ultrafiltration, ultracentrifugation, and skimmed milk etc.) and  
383 target viral species (BCoV, MHV, OC43, MgV, MS2, T3, and Phi6) (**Table S5**). Also, MF  
384 values will be also affected by water matrices that were not reflected in this comparison.  
385 Nevertheless, we found the PGM-MBs method presented higher MFs compared to the  
386 conventional counterparts in general. Specifically, MF values of PGM-MBs for TGEV (the least  
387 effective testing virus by the PGM-MBs method) were higher than 77 out of 99 MFs by  
388 conventional virus concentration methods.

389

390

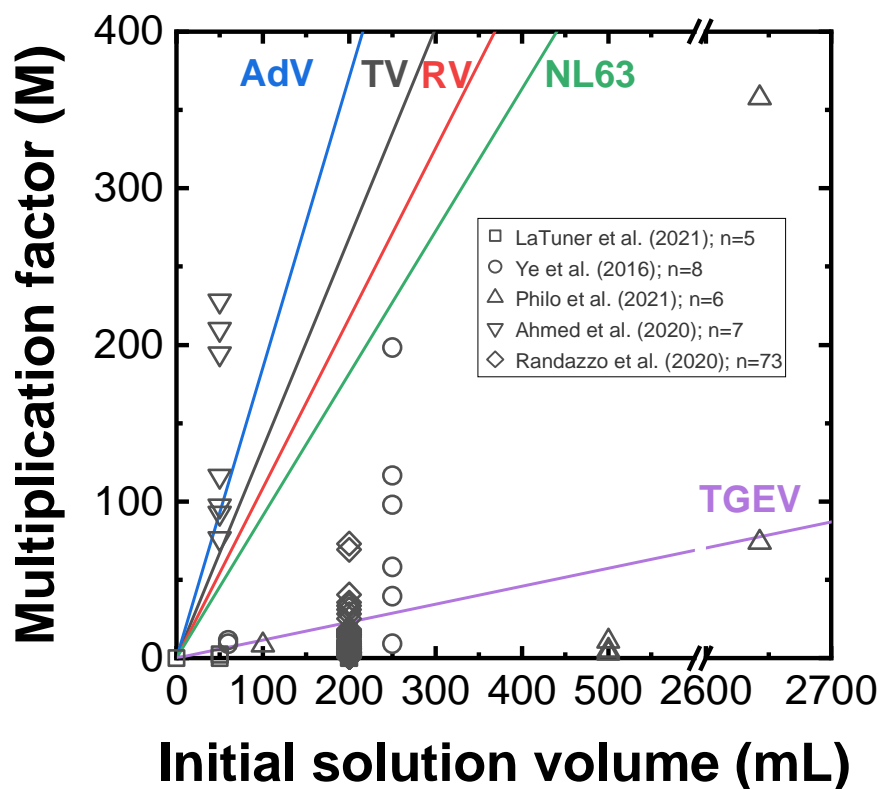

391

392 **Fig. 3.** Comparisons of multiplication factors (MF) of the PGM-MBs method to those from other  
393 studies (Ahmed et al., 2020; LaTurner et al., 2021; Philo et al., 2021; Randazzo et al., 2020; Ye  
394 et al., 2016). Solid lines are extrapolated MF from experimental results with 10 mL of influent  
395 wastewater using Eq. 7. Different colors for the solid lines represent MF for different viral  
396 species determined by the PGM-MBs method. Open symbols are MFs calculated from 99 virus  
397 concentration experiments reported by 5 different studies. Different shapes for the open symbols  
398 indicate each reference.  
399

399

### 400 3.3. Concentrating infectious viruses by the PGM-MBs method

401 The quantification of infectious virus titers in the environment are essential to evaluate  
402 accurately the risk posed to human health by viral pathogens (Haas et al., 2014). Thus, we  
403 designed experiments that evaluated the ability of PGM-MBs to concentrate infectious enteric  
404 viruses. The first experiment assessed if lab-grown viruses (TV, RV, AdV, NL63, and TGEV)  
405 spiked in wastewater could determine the environmentally relevant concentrations of these

406 viruses. We serially diluted the lab-grown viruses to the filtered influent wastewater and  
407 determined the genome concentrations and infectious virus titers. The slopes in **Fig. 4** indicate  
408 the ratio of genome concentrations to infectious virus titers in the virus-spiked wastewater. As  
409 shown in **Fig. 4**, the genome concentrations are linearly correlated with the infectious virus titers  
410 for each virus with slopes ranging from 0.87 to 1.20 ( $R^2 > 0.95$ ) except for NL63 where only two  
411 serial dilutions were measured because the initial NL63 titer was lower (about  $10^3$  TCID<sub>50</sub>/mL)  
412 than the other species. This linear correlation is used to estimate the infectious virus titers at the  
413 environment with genome concentrations.  
414

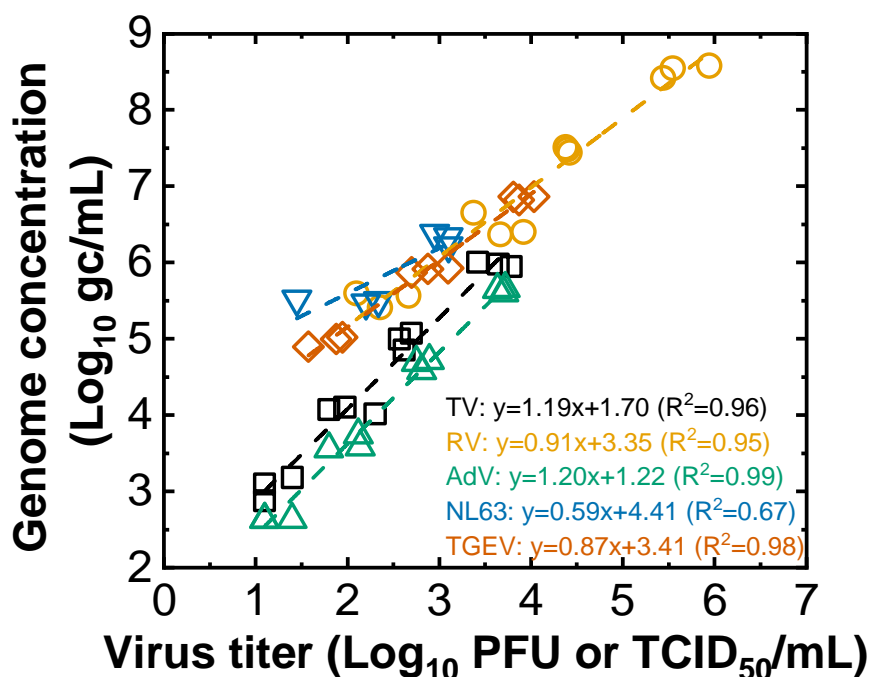

415 **Fig. 4** Calibration curves showing the relationship between infectious virus titers and genome  
416 concentrations of the virus-spiked wastewaters (n=3).  
417  
418

419 Next, we hypothesize that PGM-MBs have an intrinsic affinity to viruses with intact  
420 receptor-binding proteins that better represent infectious viruses than genome concentrations.  
421 This hypothesis is tested by experiments in which either genome concentrations or virus titers

422 were used to determine RE. We assumed the PGM-MBs has an affinity to infectious virus  
423 particles if REs determined by virus titers are higher than those by genome concentrations. **Fig. 5**  
424 shows that RE calculated by virus titers ( $RE_{\text{titer}}$ ) are significantly higher than those by genome  
425 concentration ( $RE_{\text{genome}}$ ) for the tested viral species (Paired sample t-test,  $p < 0.05$ ) except for  
426 AdV where both  $RE_{\text{titer}}$  and  $RE_{\text{genome}}$  were close to 1 (Paired sample t-test,  $p > 0.05$ ). These results  
427 support our hypothesis that PGM-MBs have a higher affinity for infectious virus particles  
428 because the receptor-based approach excludes viruses whose receptor-binding proteins are  
429 deficient. The affinity to infectious virus particles is a unique feature of this PGM-MBs method  
430 considering the fact that conventional virus concentration methods such as ultracentrifugation,  
431 ultrafiltration, PEG, and electronegative filtration showed rather lower  $RE_{\text{genome}}$  compared to  
432  $RE_{\text{titer}}$  (Rusiñol et al., 2020). Therefore, the recovered virus genomes by the PGM-MBs better  
433 represents the risk stemming from the enteric viruses in the environment than those determined  
434 by conventional counterparts.

435

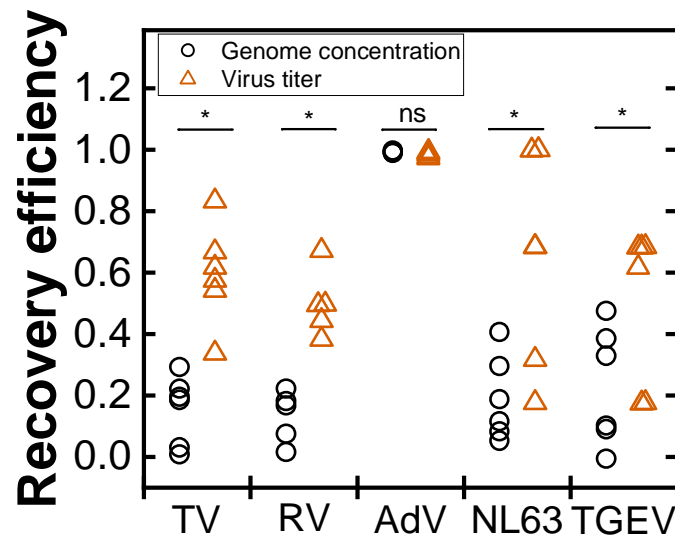

436

437 **Fig. 5.** Recovery efficiency of the PGM-MBs method in terms of virus gene copy and virus titer.  
438 Statistical analyses were performed by a paired sample t-test (ns: no significant difference and \*:  
439  $p < 0.05$  and  $n = 6$ ).  
440

#### 441 **3.4. Performance of the PGM-MBs method for unfiltered environmental samples**

442 In the experiments described in 3.3, we removed bacterial cells that may interfere with the  
443 plaque assay by filtering the samples with  $0.22 \mu\text{m}$  filters. Therefore, we designed another  
444 experiments to confirm that the PGM-MBs method works for environmental samples without the  
445 filtration process. We determined RE for each of the five viruses from the Filtered and Unfiltered  
446 sewage samples (**Fig. 6A**). The paired sample t-test results showed that the differences between  
447 the Filtered and the Unfiltered samples were not significant different except for RV ( $p > 0.05$ ).  
448 This finding support that the presence of solid particles in the sewage samples did not  
449 significantly affected performances of the PGM-MBs method. We also tested the impact of solid  
450 particles as PCR inhibitors. **Fig. 6B** presented that  $\Delta\text{Ct}$  values for TV of the final solutions,  
451 which were obtained from either Filtered or Unfiltered sewage samples, were less than 1 (one  
452 sample t-test,  $p < 0.05$ ). This finding means that negligible inhibition impact, as suggested  
453 previously (Gibson et al., 2012; Wu et al., 2018). Thus, the PGM-MBs method can minimize the  
454 effect of PCR inhibitors regardless of the existence of solid particles in the unfiltered  
455 environmental samples.  
456

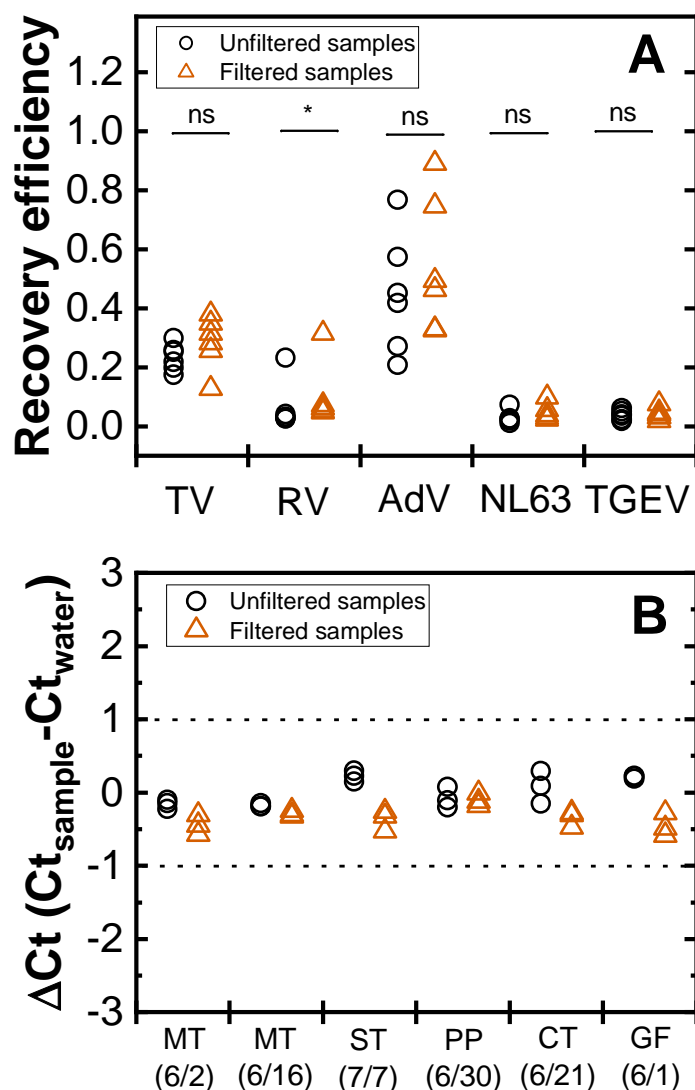

457

458 **Fig. 6.** Impact of solid particles to (A) recovery efficiency and (B) tolerance to PCR inhibitors of  
 459 the PGM-MBs method. (A) Each of five viral species were spiked to both filtered and unfiltered  
 460 samples. Recovery efficiencies of both filtered and unfiltered samples for each viral species were  
 461 compared by paired sample t-test (ns: no significant difference, \*:  $p < 0.05$  and  $n = 6$ ). (B) Both  
 462 filtered and unfiltered samples were subjected to the PGM-MBs method. TV genomes were  
 463 spiked to final solutions of the PGM-MBs method and PCR inhibitor-free water (negative  
 464 control).  $\Delta Ct$  values were calculated by subtracting  $Ct_{water}$  from  $Ct_{sample}$ . One sample t-test was  
 465 conducted twice with either a left or a right tail and all  $\Delta Ct$  values were within  $\pm 1$  ( $p < 0.05$  and  
 466  $n = 3$ ).  
 467



468           **3.5. Evaluation of the PGM-MBs method for PCR inhibitors in environmental**  
469           **samples**

470 We designed experiments to test if the PGM-MBs method can reduce the PCR inhibitors from  
471 the environmental samples. PCR inhibition was evaluated by comparing the  $\Delta C_t$  values for 21  
472 different samples (**Fig. 7**). Out of the 21 samples, 19 samples have  $\Delta C_t$  obtained by either the kit  
473 or PGM-MBs method is smaller than 1, so both the extraction kit and the PGM-MBs method  
474 were capable of eliminating PCR inhibitors for these 19 samples. For these 19 samples, there  
475 was no significant difference between  $\Delta C_t$  values of the two methods (paired sample t-test;  
476  $p > 0.05$ ). On the other hand, both methods will require dilutions to avoid PCR inhibitors in the  
477 lagoon sample and samples spiked with coal-based humic acid. However, additional 5-fold and  
478 2-fold dilution were enough for the PGM-MBs method to reduce PCR inhibitors remaining in the  
479 lagoon and humic acid samples, respectively. In contrast, those extra dilutions were not enough  
480 for the extraction kit to reduce the inhibition. Our findings agree with a previous study showing  
481 the PGM-MBs were less sensitive to the PCR inhibitors from fresh herbs and leafy vegetables  
482 than using PEG method and commercial genome extraction kit (Suresh et al., 2019). Maher et al.  
483 (2001) also demonstrated magnetic bead-based purification successfully eliminates PCR  
484 inhibitors in the airborne environment. Therefore, we concluded that the PGM-MBs method is as  
485 tolerant to PCR inhibitors in environmental samples as a commercial kit.

486

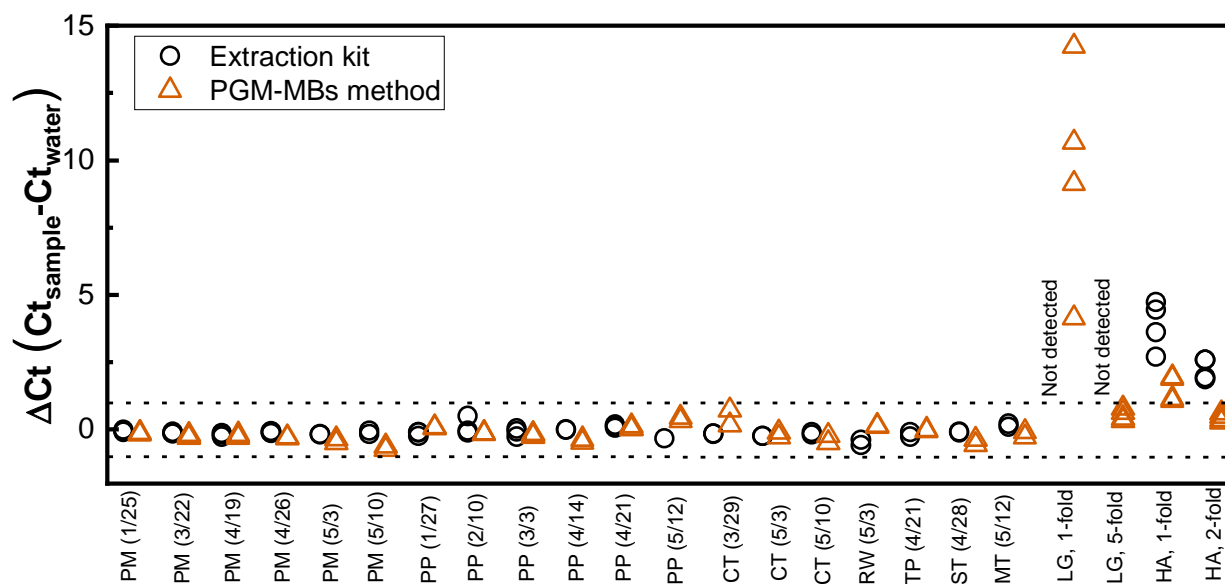

487

488 **Fig. 7.** Evaluation of a commercial genome extraction kit (Viral RNA Mini Kit, Qiagen) and the  
 489 PGM-MBs method in reducing PCR inhibitors in 20 environmental samples (different sampling  
 490 locations or dates) and 20 mg/L of humic acid dissolved water. Tulane virus was spiked to those  
 491 21 different samples that were treated by either the extraction kit or the PGM-MBs method as  
 492 well as molecular biology grade water (PCR inhibitor negative control). Lagoon and humic acid  
 493 samples were further diluted 5-, and 2-fold, respectively.  
 494

### 495 3.6. Evaluation of PGM-MBs method for specificity

496 Porcine gastric mucin consists of different types of receptors, so various viral species are  
 497 expected to bound when the PGM-MBs are applied to environmental samples (Larsson et al.,  
 498 2009; McGuckin et al., 2011). The numbers of targeted virions attached to the PGM-MBs may  
 499 be smaller than other virions which may also attach to the PGM-MBs. The attachment of these  
 500 untargeted viral species could result in false-positive amplifications (Jaroenlak et al., 2016;  
 501 Schrader et al., 2012; Tamariz et al., 2006). Therefore, we examined if the introduction of  
 502 various viruses to the PGM-MBs causes false positives for the genome of our interest.

503 First, qPCR analysis of all 175 samples of PGM-MBs in molecular biology grade water  
 504 showed no detected level of genomes for RV, AdV, NL63, and TGEV, indicating that viral  
 505 genomes did not originate from the PGM-MBs (**Table 2**). Second, analysis of PGM-MBs in

506 influent wastewater showed a few positive samples for TV, AdV, NL63, and TGEV, but 20  
507 cases out of 76 (33%) for RV (**Table 2**). Because the primers used for our porcine RV targeted  
508 the VP1 gene of rotavirus group A, the detection of human RV in the wastewater is possible. *In*  
509 *Silico* analysis using Basic Local Alignment Search Tool (BLAST) indeed confirmed that the  
510 forward and reverse primers match 100% to human RVs (GenBank ID:LC389885.1 and  
511 ID:JQ715640.1, respectively). Human RV has been found in wastewater regardless of seasons  
512 (Atabakhsh et al., 2019; Ibrahim et al., 2016). Nevertheless, the proportion of RV positive  
513 samples from the influent wastewater were not significantly different from those from the virus-  
514 spiked wastewater (two sample proportion test;  $p>0.05$ ) (**Table 2**). Ct values of pooled positive  
515 samples also did not show significant difference between the influent wastewater and the virus-  
516 spiked wastewater (two sample t-test;  $p>0.05$ ). Considering the outweighing amount of the  
517 spiking viruses (Ct values ranging from 14 to 23) over the detected Ct values (about 35), we  
518 concluded that different types of viruses collected from the wastewater by the PGM-MBs  
519 method would not significantly affect the detection of target viruses.

520

521

522 **Table 2.** Specificity tests for the PGM-MBs method.

| Positivity rate (for each viral species) or Ct values (for sum of the five viral species) |      | Solution types          |                 |                                       | Statistical analysis |
|-------------------------------------------------------------------------------------------|------|-------------------------|-----------------|---------------------------------------|----------------------|
|                                                                                           |      | Distilled Water         | Wastewater      | Virus spiked Wastewater <sup>1)</sup> |                      |
| Viral species                                                                             | TV   | 0/30 (0%) <sup>2)</sup> | 1/30 (3.3%)     | 3/39 (7.7%)                           | N.A. <sup>3)</sup>   |
|                                                                                           | RV   | 0/35 (0%)               | 20/76 (26.3%)   | 18/54 (33.3%)                         | p>0.05 <sup>4)</sup> |
|                                                                                           | AdV  | 0/40 (0%)               | 3/30 (10.0%)    | 2/30 (6.7%)                           | N.A.                 |
|                                                                                           | NL63 | 0/30 (0%)               | 2/36 (5.6%)     | 4/36 (11.1%)                          | N.A.                 |
|                                                                                           | TGEV | 0/40 (%)                | 2/30 (6.7%)     | 2/30 (6.7%)                           | N.A.                 |
| Pooled positive samples <sup>5)</sup>                                                     |      | N.A.                    | 34.5±0.9 (n=28) | 34.9±1.2 (n=29)                       | p>0.05 <sup>6)</sup> |

- 523 1) The spiked virus shows Ct values of 19.3, 22.5, 14.6, 21.2, and 23.0 for TV, RV, AdV,  
524 NL63, and TGEV, respectively.
- 525 2) The number of positive samples/total samples was presented with positivity rate in  
526 parentheses. At least five molecular replicates and six technical replicates (n>30) were  
527 measured by the qPCR.
- 528 3) Not applicable. Group of data does not satisfy the assumptions for the two-sample  
529 proportion test (i.e., np<5).
- 530 4) Positivity rates of wastewater and virus spiked wastewater were analyzed by the two-  
531 sample proportion test.
- 532 5) All the positive Ct values regardless of the viral species were pooled, and an average was  
533 presented with a standard deviation.
- 534 6) Two sample t-test compared the Ct values of wastewater and virus spiked wastewater  
535

### 536 3.7. Application of the PGM-MBs method for SARS-CoV-2 surveillance

537 We applied the electronegative membrane filtration method and the PGM-MBs methods in  
538 parallel for the SARS-CoV-2 surveillance with local sewages. The electronegative membrane  
539 filtration method represented conventional virus concentration methods here because of its high  
540 recovery efficiency (Ahmed et al., 2020; LaTurner et al., 2021; Lu et al., 2020). Seven different  
541 sewage samples, which tested positive for SARS-CoV-2 by either the filtration or the PGM-MBs  
542 method, were used for the comparison. To ensure qualities of the virus concentration processes,  
543 we spiked NL63, which recognizes the same receptors (ACE2) as SARS-CoV-2 (Rawat et al.,  
544 2021), to the sewage samples as an internal control. All the data reported showed higher than 1.0%

545 of NL63 recovery efficiency. We found that NL63 recovery efficiencies for the filtration and the  
546 PGM-MBs method were normally distributed (Shapiro-Wilk test,  $p>0.05$ ) in wide ranges from  
547 1.4 to 18.6% (**Fig. S4**). The wide range of recovery efficiencies were also reported elsewhere  
548 (Randazzo et al., 2020), and this is probably because the two methods basically collect viral  
549 genomes through virus adsorption to their media (i.e., electronegative membrane filter and the  
550 PGM-MBs), which depends on the water characteristics (pH, ionic strength, or competing  
551 substances) (Gutierrez and Nguyen, 2012). The NL63 recovery efficiencies by the  
552 electronegative membrane filtration and the PGM-MBs method were not significantly different  
553 (paired sample t-test,  $p>0.05$ ). We measured the N1 gene of SARS-CoV-2 (Nalla et al., 2020),  
554 and presented three technical replicates of Ct values, instead of concentrations, because most of  
555 the samples showed N1 gene concentrations below LOQ (**Table 3**). The Ct values for N1 gene  
556 were not significantly different between the two methods (paired sample t-test  $p>0.05$ ).  
557 Therefore, we concluded the PGM-MBs method can be applied for monitoring SARS-CoV-2 in  
558 wastewater.

559

560

561 **Table 3.** Application of the PGM-MBs method for wastewater-based SARS-CoV-2 surveillance

| Sample <sup>1)</sup> | NL63 recovery (%) (multiplication factor) |           | Ct values for N1 gene               |      |                 |         |      |      |
|----------------------|-------------------------------------------|-----------|-------------------------------------|------|-----------------|---------|------|------|
|                      | Electronegative membrane filtration       | PGM-MBs   | Electronegative membrane filtration |      |                 | PGM-MBs |      |      |
| RW (6/1)             | 2.5 (21)                                  | 6.1 (30)  | 32.8 <sup>1)</sup>                  | 33.2 | 34.2            | 33.9    | 33.1 | 33.4 |
| WS (6/1)             | 2.0 (17)                                  | 7.5 (38)  | 36.7                                | 35.0 | 36.3            | 36.4    | 34.9 | 36.4 |
| MT (6/9)             | 1.7 (14)                                  | 1.4 (7)   | 34.1                                | 33.6 | 34.0            | 37.2    | 36.5 | 36.4 |
| PM (6/13)            | 9.7 (81)                                  | 13.4 (67) | 35.9                                | 37.8 | U <sup>2)</sup> | 35.9    | 36.0 | 37.0 |
| PM (6/21)            | 12.9(107)                                 | 18.6 (93) | 36.2                                | 38.0 | U               | 34.9    | 36.9 | 36.6 |
| ST (6/2)             | 7.4 (64)                                  | 3.7 (19)  | 44.1                                | U    | U               | 38.2    | U    | U    |
| ST (7/7)             | 5.5 (46)                                  | 3.9 (19)  | 37.6                                | 35.6 | U               | 36.9    | 36.8 | U    |

- 562 1) Numbers in paranthesis indicate collected month/date.  
 563 2) Whichever shaded data set between electronegative membrane filtration and PGM-MBs  
 564 for each sample indicates lower average Ct values.  
 565 3) U stands for undetermined samples until 45 PCR cycles.  
 566

567 **4. Discussion**

568 **4.1. The PGM-MBs method proves suitability for wastewater-based epidemiology**

569 High throughput became an important factor for successful WBE because a fast turnaround for  
 570 analyzing virus concentration of wastewater is critical (Betancourt et al., 2021; Zhu et al., 2021).  
 571 The adaptability to high throughput instruments, low price, and a short operational time should  
 572 be considered to evaluate virus concentration methods. Using magnetic beads and heat  
 573 denaturation for collecting viruses and extracting viral genomes, respectively, allow the PGM-  
 574 MBs method to satisfy those three requirements. Karthikeyan et al. (2021) demonstrated that a  
 575 magnetic-bead-based approach could be implemented for an automated nucleic acid purification  
 576 system (Thermo Fisher Scientific, USA), which enabled high throughput analysis (96 samples  
 577 per run). In addition, using the PGM-MBs will further lower the cost for WBE. For example,

578 consumables for the production of the 10  $\mu$ L PGM-MBs (10 mL wastewater sample analysis)  
579 cost 0.413 USD (**Table S6**). Essential materials for this method, including magnetic beads,  
580 mucin, magnets, and proteinase K are not proprietary. Also, the entire process for the PGM-MBs  
581 method only takes less than 3 hours, including concentrating viruses (30 minutes), extracting  
582 genomes (10 minutes), and quantifying viral genomes (90 minutes), which is much shorter than  
583 conventional virus concentration methods (Cervantes-Avilés et al., 2021). For example,  
584 ultrafiltration (Haramoto et al., 2020), skimmed milk flocculation (Guerrero-Latorre et al., 2020),  
585 and PEG precipitation (La Rosa et al., 2020b) took 5.2, 9.6, and 12.8 hours only for a virus  
586 concentration step, respectively. Taken together, the PGM-MBs method is expected to be scaled  
587 up for high throughput analysis.

588

#### 589 **4.2. Performance of PGM-MBs method is comparable to or better than** 590 **conventional virus concentration methods**

591 We made two comparisons between PGM-MBs and conventional counterparts to evaluate the  
592 performances in concentrating viruses from environmental samples. First, we systematically  
593 characterize the performances of PGM-MBs method with five model viruses and wastewater.  
594 Because there are various virus concentration methods, we could not test all these conventional  
595 methods in the same experimental conditions as the experiments for the PGM-MBs method.  
596 Instead, we compared MF of the PGM-MBs method to those reported by previous studies. Note  
597 that we chose MF over LOQ for the comparison because LOQ depends on instruments (e.g.,  
598 ddPCR versus qPCR) (Falzone et al., 2020; Park et al., 2021) and qPCR methods (e.g., SYBR  
599 versus Taqman method) (Fuchs Wightman et al., 2021) while MF focuses only on the increase in  
600 viral genome concentrations by virus concentration methods. Thus, although we could compare

601 the PGM-MBs method with various experiments using different virus concentrations (**Fig. 3**), we  
602 could not directly compare the results on the same experimental conditions. To compensate for  
603 this limitation, we applied the PGM-MBs method and electronegative membrane filtration  
604 method, which is one of the most efficient virus conventional methods (Ahmed et al., 2020;  
605 LaTurner et al., 2021; Lu et al., 2020) for SARS-CoV-2 concentration under the same  
606 experimental conditions (**Table 3**). Given the findings from **Fig. 3** and **Table 3**, we concluded  
607 that the PGM-MBs method is comparable to or better than conventional methods to concentrate  
608 various enteric viruses, including SARS-CoV-2 from environmental samples.

609

## 610 **5. Conclusions**

611 This study first introduced a novel approach to concentrate enteric viruses from the  
612 environment using porcine gastric mucin-conjugated magnetic beads (PGM-MBs). This novel  
613 method is simple, fast, affordable, and comparable with conventional methods. The optimized  
614 PGM-MBs method takes less than 3 hours from virus concentration to genome quantification  
615 and costs less than 0.5 USD for 10 mL volume of sample without expensive instruments such as  
616 an ultracentrifuge. We systematically demonstrated that the performance of PGM-MBs method  
617 is comparable to or better than conventional methods to concentrate various enteric viruses,  
618 including SARS-CoV-2, from environmental samples. We also discovered that the PGM-MBs  
619 method is robust to environmental samples, which features the existence of different viral species  
620 and PCR inhibitors. Taken all together, we concluded that the PGM-MBs method can readily be  
621 used for urgent SARS-CoV-2 surveillance to cope with the current COVID-19 pandemic or  
622 monitoring other enteric viruses for better public health management.

623



624 **Acknowledgement**

625 This project is funded by the Grainger College of Engineering and the JUMP-ARCHES program  
626 of OSF Healthcare in conjunction with the University of Illinois. The Human coronavirus NL63  
627 strain (NR-470) was obtained through BEI Resources, NIAID. We thank Mr. Bruce Rabe at  
628 Urbana & Champaign Sanitary District for providing us with influent wastewater. We also  
629 acknowledge Bill Brown for sampling site selection, Hayden Wennerdahl, Kip Stevenson, Dr.  
630 Laura Keefer and Dr. Schmidt for sampling deployment, and Yuqing Mao, Aijia Zhou, Matthew  
631 Robert Loula, Aashna Patra, Kristin Joy Anderson, Mikayla Diedrick, Hubert Lyu, Hamza  
632 Elmahi Mohamed, Jad R Karajeh, Runsen Ning, Rui Fu, Kate O'Brien for sewage sampling and  
633 processing.

634

635

636

## 637 Reference

- 638 Afolayan, O.T., Webb, C.C., Cannon, J.L., 2016. Evaluation of a Porcine Gastric Mucin and  
639 RNase A Assay for the Discrimination of Infectious and Non-infectious GI.1 and GII.4  
640 Norovirus Following Thermal, Ethanol, or Levulinic Acid Plus Sodium Dodecyl Sulfate  
641 Treatments. *Food Environ. Virol.* 8, 70–78. <https://doi.org/10.1007/s12560-015-9219-z>
- 642 Ahmed, W., Bertsch, P.M., Bivins, A., Bibby, K., Farkas, K., Gathercole, A., Haramoto, E.,  
643 Gyawali, P., Korajkic, A., McMinn, B.R., Mueller, J.F., Simpson, S.L., Smith, W.J.M.,  
644 Symonds, E.M., Thomas, K. V., Verhagen, R., Kitajima, M., 2020. Comparison of virus  
645 concentration methods for the RT-qPCR-based recovery of murine hepatitis virus, a  
646 surrogate for SARS-CoV-2 from untreated wastewater. *Sci. Total Environ.* 739, 139960.  
647 <https://doi.org/10.1016/J.SCITOTENV.2020.139960>
- 648 Ahmed, W., Tschärke, B., Bertsch, P.M., Bibby, K., Bivins, A., Choi, P., Clarke, L., Dwyer, J.,  
649 Edson, J., Nguyen, T.M.H., O'Brien, J.W., Simpson, S.L., Sherman, P., Thomas, K. V.,  
650 Verhagen, R., Zaugg, J., Mueller, J.F., 2021. SARS-CoV-2 RNA monitoring in wastewater  
651 as a potential early warning system for COVID-19 transmission in the community: A  
652 temporal case study. *Sci. Total Environ.* 761, 144216.  
653 <https://doi.org/10.1016/J.SCITOTENV.2020.144216>
- 654 Albinana-Gimenez, N., Clemente-Casares, P., Bofill-Mas, S., Hundesa, A., Ribas, F., Girones, R.,  
655 2006. Distribution of Human Polyoma- viruses, Adenoviruses, and Hepatitis E Virus in the  
656 Environment and in a Drinking-Water Treatment Plant†. *Environ. Sci. Technol.* 40, 7416–  
657 7422. <https://doi.org/10.1021/ES060343I>
- 658 Araud, E., Shisler, J.L., Nguyen, T.H., 2018. Inactivation Mechanisms of Human and Animal  
659 Rotaviruses by Solar UVA and Visible Light. *Environ. Sci. Technol.* 52, 5682–5690.  
660 <https://doi.org/10.1021/acs.est.7b06562>
- 661 Atabakhsh, P., Kargar, M., Doosti, A., 2019. Molecular detection and genotyping of group A  
662 rotavirus in two wastewater treatment plants, Iran. *Brazilian J. Microbiol.* 2019 511 51,  
663 197–203. <https://doi.org/10.1007/S42770-019-00131-0>
- 664 Betancourt, W.Q., Schmitz, B.W., Innes, G.K., Prasek, S.M., Pogreba Brown, K.M., Stark, E.R.,  
665 Foster, A.R., Sprissler, R.S., Harris, D.T., Sherchan, S.P., Gerba, C.P., Pepper, I.L., 2021.  
666 COVID-19 containment on a college campus via wastewater-based epidemiology, targeted  
667 clinical testing and an intervention. *Sci. Total Environ.* 779, 146408.  
668 <https://doi.org/10.1016/J.SCITOTENV.2021.146408>
- 669 Binder, A.M., Biggs, H.M., Haynes, A.K., Chommanard, C., Lu, X., Erdman, D.D., Watson, J.T.,  
670 Gerber, S.I., 2017. Human Adenovirus Surveillance — United States, 2003–2016. *MMWR.*  
671 *Morb. Mortal. Wkly. Rep.* 66, 1039. <https://doi.org/10.15585/MMWR.MM6639A2>
- 672 Bustin, S.A., Benes, V., Garson, J.A., Hellems, J., Huggett, J., Kubista, M., Mueller, R., Nolan,  
673 T., Pfaffl, M.W., Shipley, G.L., Vandesompele, J., Wittwer, C.T., 2009. The MIQE  
674 guidelines: Minimum information for publication of quantitative real-time PCR experiments.  
675 *Clin. Chem.* 55, 611–622. <https://doi.org/10.1373/clinchem.2008.112797>
- 676 Cervantes-Avilés, P., Moreno-Andrade, I., Carrillo-Reyes, J., 2021. Approaches applied to detect  
677 SARS-CoV-2 in wastewater and perspectives post-COVID-19. *J. Water Process Eng.* 40,  
678 101947. <https://doi.org/10.1016/J.JWPE.2021.101947>
- 679 Falzone, L., Musso, N., Gattuso, G., Bongiorno, D., Palermo, C.I., Scalia, G., Libra, M., Stefani,  
680 S., 2020. Sensitivity assessment of droplet digital PCR for SARS-CoV-2 detection. *Int. J.*  
681 *Mol. Med.* 46, 957–964. <https://doi.org/10.3892/IJMM.2020.4673/HTML>

- 682 Fielding, B.C., 2011. Human coronavirus NL63: a clinically important virus? *Future Microbiol.*  
683 6, 153–159. <https://doi.org/10.2217/FMB.10.166>
- 684 Forootan, A., Sjöback, R., Björkman, J., Sjögreen, B., Linz, L., Kubista, M., 2017. Methods to  
685 determine limit of detection and limit of quantification in quantitative real-time PCR  
686 (qPCR). *Biomol. Detect. Quantif.* 12, 1. <https://doi.org/10.1016/J.BDQ.2017.04.001>
- 687 Fuchs Wightman, F., Godoy Herz, M.A., Muñoz, J.C., Stigliano, J.N., Bragado, L., Moreno,  
688 N.N., Palavecino, M., Servi, L., Cabrerizo, G., Clemente, J., Avaro, M., Pontoriero, A.,  
689 Benedetti, E., Baumeister, E., Rudolf, F., Remes Lenicov, F., Garcia, C., Buggiano, V.,  
690 Kornblihtt, A.R., Srebrow, A., de la Mata, M., Muñoz, M.J., Schor, I.E., Petrillo, E., 2021.  
691 A DNA intercalating dye-based RT-qPCR alternative to diagnose SARS-CoV-2. *RNA Biol.*  
692 [https://doi.org/10.1080/15476286.2021.1926648/SUPPL\\_FILE/KRNB\\_A\\_1926648\\_SM78](https://doi.org/10.1080/15476286.2021.1926648/SUPPL_FILE/KRNB_A_1926648_SM78)  
693 08.ZIP
- 694 Fuzawa, M., Araud, E., Li, J., Shisler, J.L., Nguyen, T.H., 2019. Free Chlorine Disinfection  
695 Mechanisms of Rotaviruses and Human Norovirus Surrogate Tulane Virus Attached to  
696 Fresh Produce Surfaces. *Environ. Sci. Technol.* 53, 11999–12006.  
697 <https://doi.org/10.1021/acs.est.9b03461>
- 698 Gibas, C., Lambirth, K., Mittal, N., Juel, M.A.I., Barua, V.B., Roppolo Brazell, L., Hinton, K.,  
699 Lontai, J., Stark, N., Young, I., Quach, C., Russ, M., Kauer, J., Nicolosi, B., Chen, D.,  
700 Akella, S., Tang, W., Schlueter, J., Munir, M., 2021. Implementing building-level SARS-  
701 CoV-2 wastewater surveillance on a university campus. *Sci. Total Environ.* 782, 146749.  
702 <https://doi.org/10.1016/J.SCITOTENV.2021.146749>
- 703 Gibson, K.E., Schwab, K.J., Spencer, S.K., Borchardt, M.A., 2012. Measuring and mitigating  
704 inhibition during quantitative real time PCR analysis of viral nucleic acid extracts from  
705 large-volume environmental water samples. *Water Res.* 46, 4281–4291.  
706 <https://doi.org/10.1016/J.WATRES.2012.04.030>
- 707 Gorrepati, E.A., Wongthahan, P., Raha, S., Fogler, H.S., 2010. Silica precipitation in acidic  
708 solutions: Mechanism, pH effect, and salt effect. *Langmuir* 26, 10467–10474.  
709 [https://doi.org/10.1021/LA904685X/SUPPL\\_FILE/LA904685X\\_SI\\_001.PDF](https://doi.org/10.1021/LA904685X/SUPPL_FILE/LA904685X_SI_001.PDF)
- 710 Guerrero-Latorre, L., Ballesteros, I., Villacrés-Granda, I., Granda, M.G., Freire-Paspuel, B.,  
711 Ríos-Touma, B., 2020. SARS-CoV-2 in river water: Implications in low sanitation countries.  
712 *Sci. Total Environ.* 743, 140832. <https://doi.org/10.1016/J.SCITOTENV.2020.140832>
- 713 Gutierrez, L., Nguyen, T.H., 2012. Interactions between rotavirus and Suwannee River organic  
714 matter: Aggregation, deposition, and adhesion force measurement. *Environ. Sci. Technol.*  
715 46, 8705–8713.  
716 [https://doi.org/10.1021/ES301336U/SUPPL\\_FILE/ES301336U\\_SI\\_001.PDF](https://doi.org/10.1021/ES301336U/SUPPL_FILE/ES301336U_SI_001.PDF)
- 717 Haas, C.N., Rose, J.B., Gerba, C.P., 2014. *Quantitative Microbial Risk Assessment*. John Wiley  
718 & Sons.
- 719 Haramoto, E., Kitajima, M., Hata, A., Torrey, J.R., Masago, Y., Sano, D., Katayama, H., 2018. A  
720 review on recent progress in the detection methods and prevalence of human enteric viruses  
721 in water. *Water Res.* 135, 168–186. <https://doi.org/10.1016/J.WATRES.2018.02.004>
- 722 Haramoto, E., Malla, B., Thakali, O., Kitajima, M., 2020. First environmental surveillance for  
723 the presence of SARS-CoV-2 RNA in wastewater and river water in Japan. *Sci. Total*  
724 *Environ.* 737, 140405. <https://doi.org/10.1016/J.SCITOTENV.2020.140405>
- 725 Harris-Lovett, S., Nelson, K.L., Beamer, P., Bischel, H.N., Bivins, A., Bruder, A., Butler, C.,  
726 Camenisch, T.D., De Long, S.K., Karthikeyan, S., Larsen, D.A., Meierdiercks, K., Mouser,  
727 P.J., Pagsuyoin, S., Prasek, S.M., Radniecki, T.S., Ram, J.L., Keith Roper, D., Safford, H.,

- 728 Sherchan, S.P., Shuster, W., Stalder, T., Wheeler, R.T., Korfmacher, K.S., 2021.  
729 Wastewater Surveillance for SARS-CoV-2 on College Campuses: Initial Efforts, Lessons  
730 Learned, and Research Needs. *Int. J. Environ. Res. Public Health* 18.  
731 <https://doi.org/10.3390/IJERPH18094455>
- 732 Hart, O.E., Halden, R.U., 2020. Computational analysis of SARS-CoV-2/COVID-19  
733 surveillance by wastewater-based epidemiology locally and globally: Feasibility, economy,  
734 opportunities and challenges. *Sci. Total Environ.* 730, 138875.  
735 <https://doi.org/10.1016/J.SCITOTENV.2020.138875>
- 736 Hu, Zhiliang, Song, C., Xu, C., Jin, G., Chen, Y., Xu, X., Ma, H., Chen, W., Lin, Y., Zheng, Y.,  
737 Wang, J., Hu, Zhibin, Yi, Y., Shen, H., 2020. Clinical characteristics of 24 asymptomatic  
738 infections with COVID-19 screened among close contacts in Nanjing, China. *Sci. China*  
739 *Life Sci.* 63, 706–711. <https://doi.org/10.1007/s11427-020-1661-4>
- 740 Ibrahim, C., Cherif, N., Hammami, S., Pothier, P., Hassen, A., 2016. Quantification and  
741 Genotyping of Rotavirus A within Two Wastewater Treatment Processes. *CLEAN – Soil,*  
742 *Air, Water* 44, 393–401. <https://doi.org/10.1002/CLEN.201400588>
- 743 Jafferli, M.H., Khatami, K., Atasoy, M., Birgersson, M., Williams, C., Cetecioglu, Z., 2021.  
744 Benchmarking virus concentration methods for quantification of SARS-CoV-2 in raw  
745 wastewater. *Sci. Total Environ.* 755, 142939.  
746 <https://doi.org/10.1016/J.SCITOTENV.2020.142939>
- 747 Jaroenlak, P., Sanguanrut, P., Williams, B.A.P., Stentiford, G.D., Flegel, T.W., Sritunyalucksana,  
748 K., Itsathitphaisarn, O., 2016. A Nested PCR Assay to Avoid False Positive Detection of the  
749 Microsporidian *Enterocytozoon hepatopenaei* (EHP) in Environmental Samples in Shrimp  
750 Farms. *PLoS One* 11, e0166320. <https://doi.org/10.1371/JOURNAL.PONE.0166320>
- 751 Kang, G., 2017. Viral Diarrhea. *Int. Encycl. Public Heal.* 360. [https://doi.org/10.1016/B978-0-](https://doi.org/10.1016/B978-0-12-803678-5.00486-0)  
752 [12-803678-5.00486-0](https://doi.org/10.1016/B978-0-12-803678-5.00486-0)
- 753 Kapikian, A.Z., 1996. Overview of viral gastroenteritis. *Arch. Virol. Suppl.* 1996, 7–19.  
754 [https://doi.org/10.1007/978-3-7091-6553-9\\_2](https://doi.org/10.1007/978-3-7091-6553-9_2)
- 755 Karthikeyan, S., Ronquillo, N., Belda-Ferre, P., Alvarado, D., Javidi, T., Longhurst, C.A.,  
756 Knight, R., 2021. High-Throughput Wastewater SARS-CoV-2 Detection Enables  
757 Forecasting of Community Infection Dynamics in San Diego County. *mSystems* 6.  
758 [https://doi.org/10.1128/MSYSTEMS.00045-21/SUPPL\\_FILE/MSYSTEMS.00045-21-](https://doi.org/10.1128/MSYSTEMS.00045-21/SUPPL_FILE/MSYSTEMS.00045-21-ST003.DOCX)  
759 [ST003.DOCX](https://doi.org/10.1128/MSYSTEMS.00045-21-ST003.DOCX)
- 760 Katayama, H., Shimasaki, A., Ohgaki, S., 2002. Development of a Virus Concentration Method  
761 and Its Application to Detection of Enterovirus and Norwalk Virus from Coastal Seawater.  
762 *Appl. Environ. Microbiol.* 68, 1033–1039. [https://doi.org/10.1128/AEM.68.3.1033-](https://doi.org/10.1128/AEM.68.3.1033-1039.2002)  
763 [1039.2002](https://doi.org/10.1128/AEM.68.3.1033-1039.2002)
- 764 Kralik, P., Ricchi, M., 2017. A basic guide to real time PCR in microbial diagnostics: Definitions,  
765 parameters, and everything. *Front. Microbiol.* 8, 108.  
766 <https://doi.org/10.3389/FMICB.2017.00108/BIBTEX>
- 767 La Rosa, G., Bonadonna, L., Lucentini, L., Kenmoe, S., Suffredini, E., 2020a. Coronavirus in  
768 water environments: Occurrence, persistence and concentration methods - A scoping review.  
769 *Water Res.* 179, 115899. <https://doi.org/10.1016/J.WATRES.2020.115899>
- 770 La Rosa, G., Iaconelli, M., Mancini, P., Bonanno Ferraro, G., Veneri, C., Bonadonna, L.,  
771 Lucentini, L., Suffredini, E., 2020b. First detection of SARS-CoV-2 in untreated  
772 wastewaters in Italy. *Sci. Total Environ.* 736, 139652.  
773 <https://doi.org/10.1016/J.SCITOTENV.2020.139652>

- 774 Larsson, J.M.H., Karlsson, H., Sjövall, H., Hansson, G.C., 2009. A complex, but uniform O-  
775 glycosylation of the human MUC2 mucin from colonic biopsies analyzed by nanoLC/MSn.  
776 *Glycobiology* 19, 756–766. <https://doi.org/10.1093/GLYCOB/CWP048>
- 777 LaTurner, Z.W., Zong, D.M., Kalvapalle, P., Gamas, K.R., Terwilliger, A., Crosby, T., Ali, P.,  
778 Avadhanula, V., Santos, H.H., Weesner, K., Hopkins, L., Piedra, P.A., Maresso, A.W.,  
779 Stadler, L.B., 2021. Evaluating recovery, cost, and throughput of different concentration  
780 methods for SARS-CoV-2 wastewater-based epidemiology. *Water Res.* 197, 117043.  
781 <https://doi.org/10.1016/J.WATRES.2021.117043>
- 782 Lodder, W.J., De Roda Husman, A.M., 2005. Presence of noroviruses and other enteric viruses  
783 in sewage and surface waters in The Netherlands. *Appl. Environ. Microbiol.* 71, 1453–1461.  
784 <https://doi.org/10.1128/AEM.71.3.1453-1461.2005>
- 785 Lu, D., Huang, Z., Luo, J., Zhang, X., Sha, S., 2020. Primary concentration – The critical step in  
786 implementing the wastewater based epidemiology for the COVID-19 pandemic: A mini-  
787 review. *Sci. Total Environ.* 747, 141245. <https://doi.org/10.1016/j.scitotenv.2020.141245>
- 788 Maher, N., Dillon, H.K., Vermund, S.H., Unnasch, T.R., 2001. Magnetic bead capture eliminates  
789 PCR inhibitors in samples collected from the airborne environment, permitting detection of  
790 *Pneumocystis carinii* DNA. *Appl. Environ. Microbiol.* 67, 449–452.  
791 [https://doi.org/10.1128/AEM.67.1.449-452.2001/ASSET/2BB3A5B0-1602-400E-A0C3-  
792 C32CFC5AFC72/ASSETS/GRAPHIC/AM0110760003.JPEG](https://doi.org/10.1128/AEM.67.1.449-452.2001/ASSET/2BB3A5B0-1602-400E-A0C3-<br/>792 C32CFC5AFC72/ASSETS/GRAPHIC/AM0110760003.JPEG)
- 793 McGuckin, M.A., Lindén, S.K., Sutton, P., Florin, T.H., 2011. Mucin dynamics and enteric  
794 pathogens. *Nat. Rev. Microbiol.* 2011 9 9, 265–278. <https://doi.org/10.1038/nrmicro2538>
- 795 Nalla, A.K., Casto, A.M., Huang, M.-L.W., Perchetti, G.A., Sampoleo, R., Shrestha, L., Wei, Y.,  
796 Zhu, H., Jerome, K.R., Greninger, A.L., 2020. Comparative Performance of SARS-CoV-2  
797 Detection Assays Using Seven Different Primer-Probe Sets and One Assay Kit.  
798 <https://doi.org/10.2807/1560-7917.ES.2020>
- 799 Nemudryi, A., Nemudraia, A., Wiegand, T., Surya, K., Buyukyoruk, M., Cicha, C., Vanderwood,  
800 K.K., Wilkinson, R., Wiedenheft, B., 2020. Temporal Detection and Phylogenetic  
801 Assessment of SARS-CoV-2 in Municipal Wastewater. *Cell Reports Med.* 1, 100098.  
802 <https://doi.org/10.1016/J.XCRM.2020.100098>
- 803 Oh, C., Sun, P.P., Araud, E., Nguyen, T.H., 2020. Mechanism and efficacy of virus inactivation  
804 by a microplasma UV lamp generating monochromatic UV irradiation at 222 nm. *Water*  
805 *Res.* 186. <https://doi.org/10.1016/j.watres.2020.116386>
- 806 Panchal, D., Prakash, O., Bobde, P., Pal, S., 2021. SARS-CoV-2: sewage surveillance as an early  
807 warning system and challenges in developing countries. *Environ. Sci. Pollut. Res.* 2021  
808 2818 28, 22221–22240. <https://doi.org/10.1007/S11356-021-13170-8>
- 809 Park, C., Lee, Jina, ul Hassan, Z., Ku, K.B., Kim, S.J., Kim, H.G., Park, E.C., Park, G.S., Park,  
810 Daeui, Baek, S.H., Park, Dongju, Lee, Jihye, Jeon, S., Kim, Seungtaek, Lee, C.S., Yoo,  
811 H.M., Kim, Seil, 2021. Comparison of Digital PCR and Quantitative PCR with Various  
812 SARS-CoV-2 Primer-Probe Sets. *J. Microbiol. Biotechnol.* 31, 358–367.  
813 <https://doi.org/10.4014/JMB.2009.09006>
- 814 Pecson, B.M., Darby, E., Haas, C.N., Amha, Y.M., Bartolo, M., Danielson, R., Dearborn, Y., Di  
815 Giovanni, G., Ferguson, C., Fevig, S., Gaddis, E., Gray, D., Lukasik, G., Mull, B., Olivias,  
816 L., Olivieri, A., Qu, Y., SARS-CoV-2 Interlaboratory Consortium, 2021. Reproducibility  
817 and sensitivity of 36 methods to quantify the SARS-CoV-2 genetic signal in raw wastewater:  
818 findings from an interlaboratory methods evaluation in the U.S. *Environ. Sci. Water Res.*  
819 *Technol.* <https://doi.org/10.1039/d0ew00946f>



- 820 Philo, S.E., Keim, E.K., Swanstrom, R., Ong, A.Q.W., Burnor, E.A., Kossik, A.L., Harrison, J.C.,  
821 Demeke, B.A., Zhou, N.A., Beck, N.K., Shirai, J.H., Meschke, J.S., 2021. A comparison of  
822 SARS-CoV-2 wastewater concentration methods for environmental surveillance. *Sci. Total*  
823 *Environ.* 760, 144215. <https://doi.org/10.1016/J.SCITOTENV.2020.144215>
- 824 Polo, D., Quintela-Baluja, M., Corbishley, A., Jones, D.L., Singer, A.C., Graham, D.W.,  
825 Romalde, J.L., 2020. Making waves: Wastewater-based epidemiology for COVID-19 –  
826 approaches and challenges for surveillance and prediction. *Water Res.* 186, 116404.  
827 <https://doi.org/10.1016/J.WATRES.2020.116404>
- 828 Randazzo, W., Truchado, P., Cuevas-Ferrando, E., Simón, P., Allende, A., Sánchez, G., 2020.  
829 SARS-CoV-2 RNA in wastewater anticipated COVID-19 occurrence in a low prevalence  
830 area. *Water Res.* 181, 115942. <https://doi.org/10.1016/J.WATRES.2020.115942>
- 831 Rawat, P., Jemimah, S., Ponnuswamy, P.K., Gromiha, M.M., 2021. Why are ACE2 binding  
832 coronavirus strains SARS-CoV/SARS-CoV-2 wild and NL63 mild? *Proteins Struct. Funct.*  
833 *Bioinforma.* 89, 389–398. <https://doi.org/10.1002/PROT.26024>
- 834 Rusiñol, M., Martínez-Puchol, S., Forés, E., Itarte, M., Girones, R., Bofill-Mas, S., 2020.  
835 Concentration methods for the quantification of coronavirus and other potentially pandemic  
836 enveloped virus from wastewater. *Curr. Opin. Environ. Sci. Heal.* 17, 21–28.  
837 <https://doi.org/10.1016/J.COESH.2020.08.002>
- 838 Satyanarayana, M., 2020. Shortage of RNA extraction kits hampers efforts to ramp up COVID-  
839 19 coronavirus testing [WWW Document]. URL [https://cen.acs.org/analytical-](https://cen.acs.org/analytical-chemistry/diagnostics/Shortage-RNA-extraction-kits-hampers/98/web/2020/03)  
840 [chemistry/diagnostics/Shortage-RNA-extraction-kits-hampers/98/web/2020/03](https://cen.acs.org/analytical-chemistry/diagnostics/Shortage-RNA-extraction-kits-hampers/98/web/2020/03) (accessed  
841 11.23.21).
- 842 Schrader, C., Schielke, A., Ellerbroek, L., Johne, R., 2012. PCR inhibitors - occurrence,  
843 properties and removal. *J. Appl. Microbiol.* 113, 1014–1026. [https://doi.org/10.1111/j.1365-](https://doi.org/10.1111/j.1365-2672.2012.05384.x)  
844 [2672.2012.05384.x](https://doi.org/10.1111/j.1365-2672.2012.05384.x)
- 845 Sherchan, S.P., Shahin, S., Patel, J., Ward, L.M., Tandukar, S., Uprety, S., Schmitz, B.W.,  
846 Ahmed, W., Simpson, S., Gyawali, P., 2021. Occurrence of SARS-CoV-2 RNA in Six  
847 Municipal Wastewater Treatment Plants at the Early Stage of COVID-19 Pandemic in The  
848 United States. *Pathog. (Basel, Switzerland)* 10.  
849 <https://doi.org/10.3390/PATHOGENS10070798>
- 850 Suresh, M., Harlow, J., Nasheri, N., 2019. Evaluation of porcine gastric mucin assay for  
851 detection and quantification of human norovirus in fresh herbs and leafy vegetables. *Food*  
852 *Microbiol.* 84, 103254. <https://doi.org/10.1016/J.FM.2019.103254>
- 853 Tamariz, J., Voynarovska, K., Prinz, M., Caragine, T., 2006. The Application of Ultraviolet  
854 Irradiation to Exogenous Sources of DNA in Plasticware and Water for the Amplification of  
855 Low Copy Number DNA. *J. Forensic Sci.* 51, 790–794. [https://doi.org/10.1111/J.1556-](https://doi.org/10.1111/J.1556-4029.2006.00172.X)  
856 [4029.2006.00172.X](https://doi.org/10.1111/J.1556-4029.2006.00172.X)
- 857 Uchida, E., Kogi, M., Oshizawa, T., Furuta, B., Satoh, K., Iwata, A., Murata, M., Hikata, M.,  
858 Yamaguchi, T., 2007. Optimization of the virus concentration method using  
859 polyethyleneimine-conjugated magnetic beads and its application to the detection of human  
860 hepatitis A, B and C viruses. *J. Virol. Methods* 143, 95–103.  
861 <https://doi.org/10.1016/J.JVIROMET.2007.02.014>
- 862 Walker, D.I., Cross, L.J., Stapleton, T.A., Jenkins, C.L., Lees, D.N., Lowther, J.A., 2019.  
863 Assessment of the Applicability of Capsid-Integrity Assays for Detecting Infectious  
864 Norovirus Inactivated by Heat or UV Irradiation. *Food Environ. Virol.* 11, 229–237.  
865 <https://doi.org/10.1007/s12560-019-09390-4>

- 866 Waruhiu, C., Ommeh, S., Obanda, V., Agwanda, B., Gakuya, F., Ge, X.Y., Yang, X. Lou, Wu,  
867 L.J., Zohaib, A., Hu, B., Shi, Z.L., 2017. Molecular detection of viruses in Kenyan bats and  
868 discovery of novel astroviruses, caliciviruses and rotaviruses. *Viol. Sin.* 2017 322 32, 101–  
869 114. <https://doi.org/10.1007/S12250-016-3930-2>
- 870 Wolfe, M.K., Archana, A., Catoe, D., Coffman, M.M., Dorevich, S., Graham, K.E., Kim, S.,  
871 Grijalva, L.M., Roldan-Hernandez, L., Silverman, A.I., Sinnott-Armstrong, N., Vugia, D.J.,  
872 Yu, A.T., Zambrana, W., Wigginton, K.R., Boehm, A.B., 2021. Scaling of SARS-CoV-2  
873 RNA in Settled Solids from Multiple Wastewater Treatment Plants to Compare Incidence  
874 Rates of Laboratory-Confirmed COVID-19 in Their Sewersheds. *Environ. Sci. Technol.*  
875 *Lett.* 8, 398–404. <https://doi.org/10.1021/ACS.ESTLETT.1C00184>
- 876 Wu, Q., Kawano, K., Uehara, Y., Okuda, N., Hongo, M., Tsuji, S., Yamanaka, H., Minamoto, T.,  
877 2018. Environmental DNA reveals nonmigratory individuals of *Palaemon paucidens*  
878 overwintering in Lake Biwa shallow waters. *Freshw. Sci.* 37, 307–314.  
879 <https://doi.org/10.1086/697542/ASSET/IMAGES/LARGE/FG3.JPG>
- 880 Ye, Y., Ellenberg, R.M., Graham, K.E., Wigginton, K.R., 2016. Survivability, Partitioning, and  
881 Recovery of Enveloped Viruses in Untreated Municipal Wastewater. *Environ. Sci. Technol.*  
882 50, 5077–5085.  
883 [https://doi.org/10.1021/ACS.EST.6B00876/SUPPL\\_FILE/ES6B00876\\_SI\\_001.PDF](https://doi.org/10.1021/ACS.EST.6B00876/SUPPL_FILE/ES6B00876_SI_001.PDF)
- 884 Yu, G., Zhang, D., Guo, F., Tan, M., Jiang, X., Jiang, W., 2013. Cryo-EM Structure of a Novel  
885 Calicivirus, Tulane Virus. *PLoS One* 8, 59817.  
886 <https://doi.org/10.1371/journal.pone.0059817>
- 887 Zhu, Y., Oishi, W., Maruo, C., Saito, M., Chen, R., Kitajima, M., Sano, D., 2021. Early warning  
888 of COVID-19 via wastewater-based epidemiology: potential and bottlenecks. *Sci. Total*  
889 *Environ.* 767, 145124. <https://doi.org/10.1016/J.SCITOTENV.2021.145124>
- 890
